# Supplementary material for: Characterization of Serum Proteins Associated with IL28B Genotype among Patients with Chronic Hepatitis C
Source: PLoS One. 2011 Jul 5;6(7):e21854. doi: 10.1371/journal.pone.0021854 (PMC3130042; doi:10.1371/journal.pone.0021854)
Supplement: Materials S1 — Matlab script. (M) [file pone.0021854.s003.m]

%%%%%%%%%%%%%%%%%%%%%%%%%%%%%%%%%%%%%%%%%%%%%%%%%%%
%%% MATLAB SCRIPT TO REPRODUCE REPORTED RESULTS %%%
%%%%%%%%%%%%%%%%%%%%%%%%%%%%%%%%%%%%%%%%%%%%%%%%%%%

%%%%% NOTES %%%%% 
%%% THE METAPROTEIN FACTOR MODEL DISCUSSED IN THIS PAPER HAS BEEN CREATED 
%%% USING SEPARATE SCRIPTS AND UTILITY FUNCTIONS. THEY MAY BE MADE
%%% AVAILABLE UPON REQUEST.  

%%% THE 'DAT' STRUCTURE CONTAINS ALL OF THE ORIGINAL DATA USED FOR 
%%% ANALYSIS.

%%% THE 'PRMS' STRUCTURE CONTAINS THE METAPROTEIN FACTOR MODEL OUTPUT.

%%%%% END NOTES %%%%%


%%% LOAD THE WORKSPACE. 
load pQTL_workspace.mat;


%%% DESCRIPTIVE ANALYSIS OF PATIENT COHORT
% Gender
tabulate(dat.key(:,find(strcmp(dat.keyHead,'Gender'))))
% Race
tabulate(dat.key(:,find(strcmp(dat.keyHead,'race'))))
% Treatment response
tabulate(dat.key(:,find(strcmp(dat.keyHead,'txresp'))))
% IL28B genotype (coded AA,AG,GG. Take complement: TT,TC,CC)
rs12979860 = dat.key(:,find(strcmp(dat.keyHead,'rs12979860_IL28')));
rs12979860 = regexprep(rs12979860,'AA','TT');
rs12979860 = regexprep(rs12979860,'AG','TC');
rs12979860 = regexprep(rs12979860,'GG','CC');
tabulate(rs12979860)
%%% Age
mean(cell2mat(dat.key(:,find(strcmp(dat.keyHead,'agetx'))))/365.25)
std(cell2mat(dat.key(:,find(strcmp(dat.keyHead,'agetx'))))/365.25)


%%% TEST METAPROTEINS FOR ASSOCIATION WITH IL28B GENOTYPE
pvs=ones(size(prms.uPtn,1),1);
for(i=1:length(pvs))
    pvs(i)=anova1(prms.lambda(i,:)',rs12979860,'off');
end;
% Bonferroni correction for multiple hypothesis testing
find(pvs<.05/length(pvs))  
% Only a single metaprotein is significant. Obtain its p-value
pvs(80)
% Details
[p,table,stats]=anova1(prms.lambda(80,:)',rs12979860,'off')
multcompare(stats)


%%% CBG DETERMINATION AND COMPOSITION (BASED ON THE SINGLE SIGNIFICANT
%%% P-VALUE FROM ABOVE ONE-WAY ANOVA)
[jnk mem]=max(prms.memProb,[],2);
find(mem == 80)
dat.anno(find(mem==80),find(strcmp(dat.annoHead,'Primary Protein Name')))


%%% CHECK FOR CBG ASSOCIATION WHILE CONTROLLING FOR RACE AND GENDER
cbg=prms.lambda(80,:)';
race_num=1*strcmp(dat.key(:,find(strcmp(dat.keyHead,'race'))),'White');
gender_num=1*strcmp(dat.key(:,find(strcmp(dat.keyHead,'Gender'))),'male');
recessive=regexprep(rs12979860,'t(\w*)','TC/TT','preservecase');
recessive_num=1*strcmp(recessive,'CC');
g=rs12979860;
g(find(strcmp(g,'CC')))=cellstr('0');
g(find(strcmp(g,'TC')))=cellstr('1');
g(find(strcmp(g,'TT')))=cellstr('2');
gtype=str2num(char(g));
% Additive model
[b,bint,r,rint,stats]=regress(cbg,[ones(41,1) gtype gender_num race_num])
% Recessive model
[b,bint,r,rint,stats]=regress(cbg,[ones(41,1) recessive_num gender_num race_num])


%%% ASSOCIATION BETWEEN CBG (X1) AND SVR (Y), CONTROLLING FOR GENDER (X2) AND RACE (X3)
[b,dev,stats]=glmfit([cbg gender_num race_num],1*strcmp(dat.key(:,1),'SVR'),'binomial','link','logit')
stats.p

%%% ASSOCIATION BETWEEN IL28B (X1) AND SVR (Y), CONTROLLING FOR GENDER (X2) AND RACE (X3)
[b,dev,stats]=glmfit([recessive_num gender_num race_num],1*strcmp(dat.key(:,1),'SVR'),'binomial','link','logit')
stats.p

%%% ASSOCIATION BETWEEN CBG (X1), IL28B (X2) AND SVR (Y), CONTROLLING FOR GENDER (X3) AND RACE (X4)
[b,dev,stats]=glmfit([cbg recessive_num gender_num race_num],1*strcmp(dat.key(:,1),'SVR'),'binomial','link','logit')
stats.p


%%% CORRELATION AMONG CBG PEPTIDES
pep_xpr = dat.xpr(find(mem == 80),:);
corrcoef(pep_xpr')
